# Supplementary material for: The transition from a molecular to a continuum solvent in electrical double layers showing ion–ion correlation effects
Source: Royal Society of Chemistry journal article supplement (doi:10.1039/c1cp20514e), 2011-01-01
Supplement: c1cp20514e.pdf [file c1cp20514e.pdf]

# The transition from a molecular to a continuum solvent in electrical double layers showing ion-ion correlation effects.

Luís Pegado<sup>a,‡,\*</sup>, Bo Jönsson<sup>b</sup> and Håkan Wennerström<sup>a</sup>

<sup>a</sup> Physical Chemistry and

<sup>b</sup> Theoretical Chemistry, Center for Chemistry and Chemical Engineering, Lund University, POB 124, SE-22100 Lund, Sweden

<sup>‡</sup> Present address: Paul Scherrer Institute, Laboratory for Waste Management, CH-5232 Villigen, Switzerland

\* Corresponding author: luis.pegado@psi.ch

## Electronic Supplementary Information

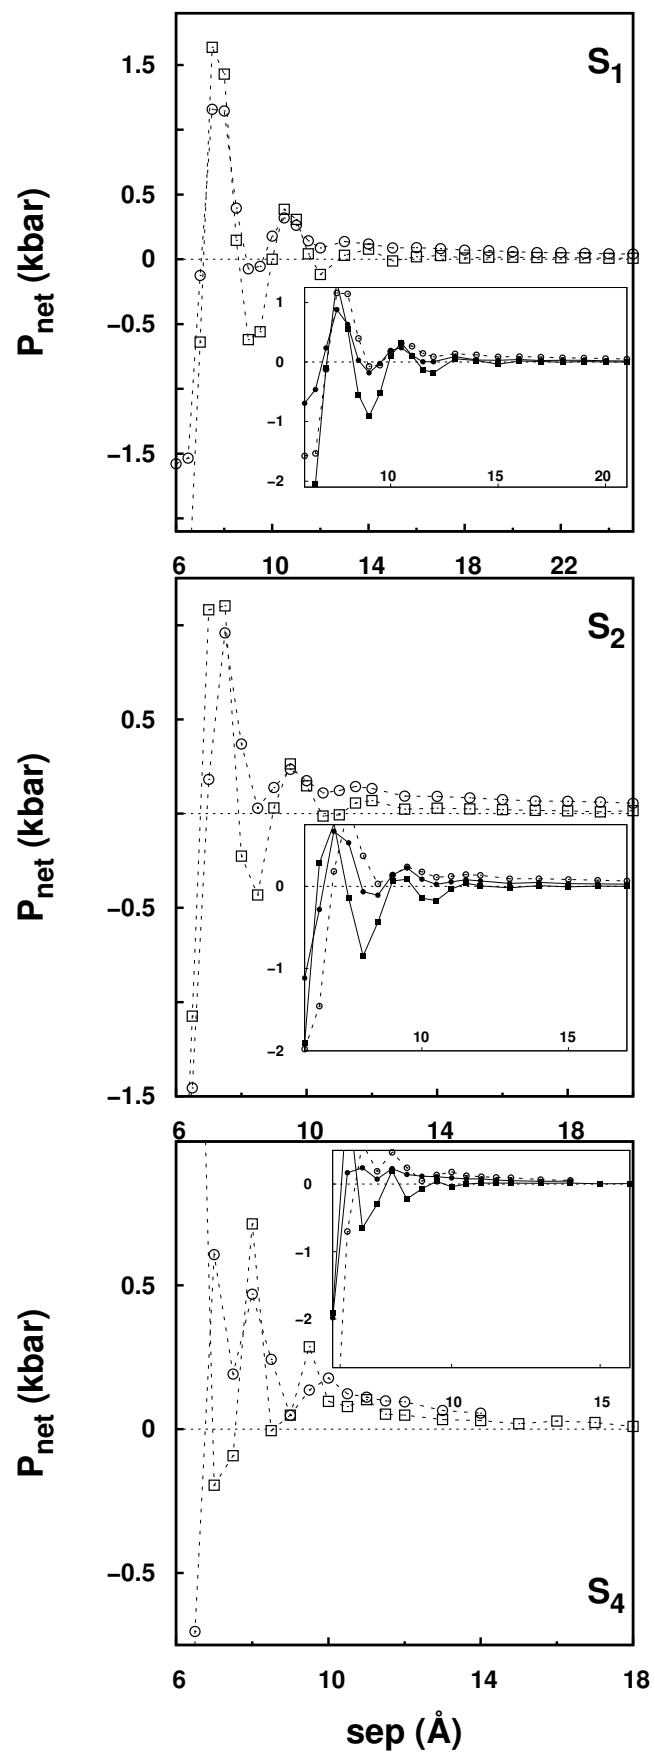

**Figure S1** As in Figure 4, but for the  $S_1$ ,  $S_2$  and  $S_4$  systems.

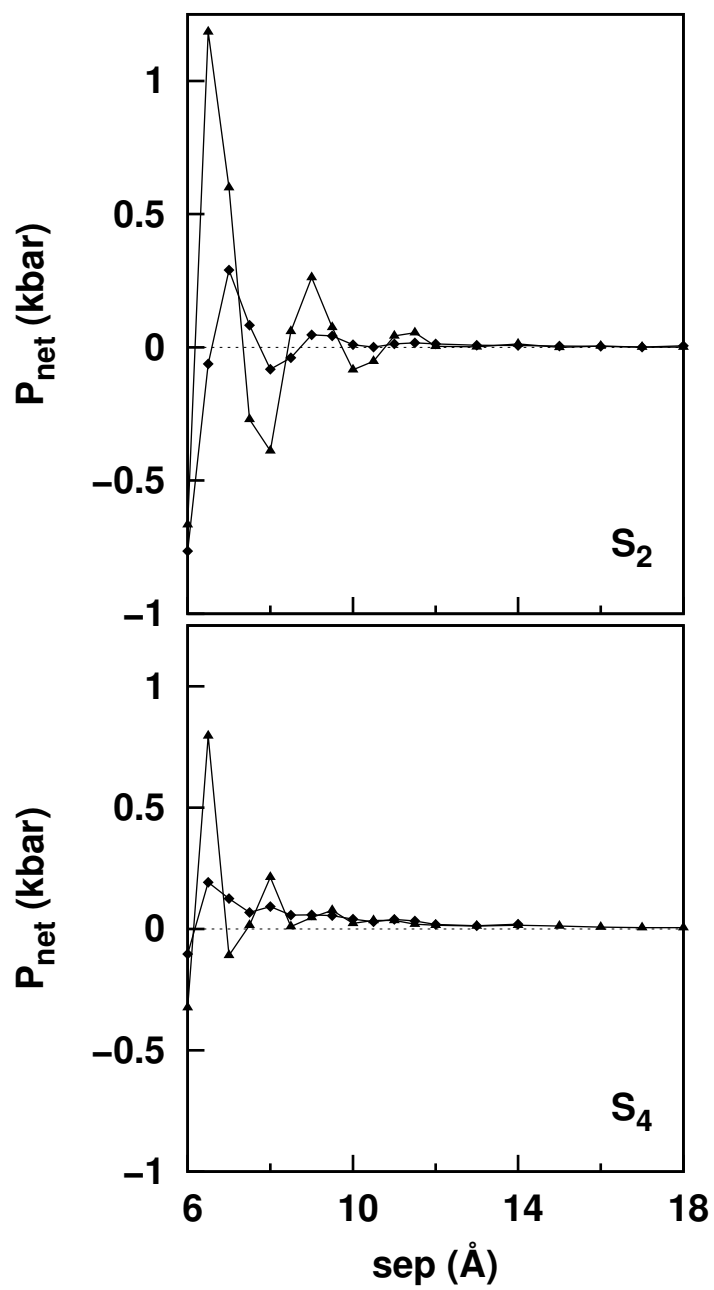

Figure S2 As in Figure 6, but for the  $S_2$  and  $S_4$  systems.

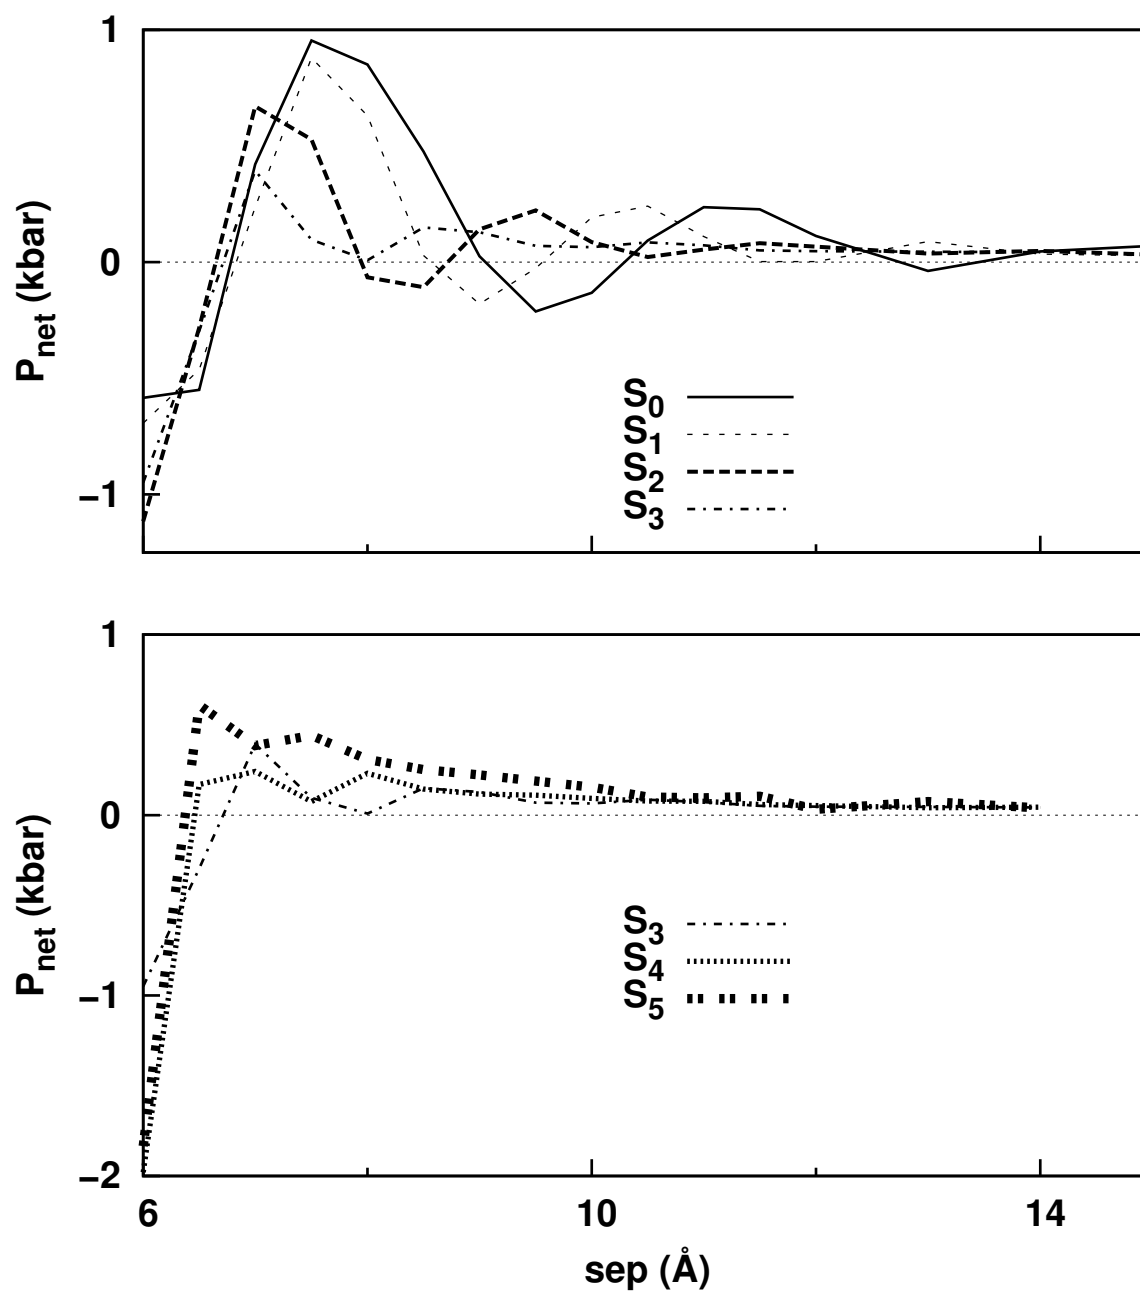

Figure S3 As in Figure 5, but for the  $q = 0.5e$ , HE cases.

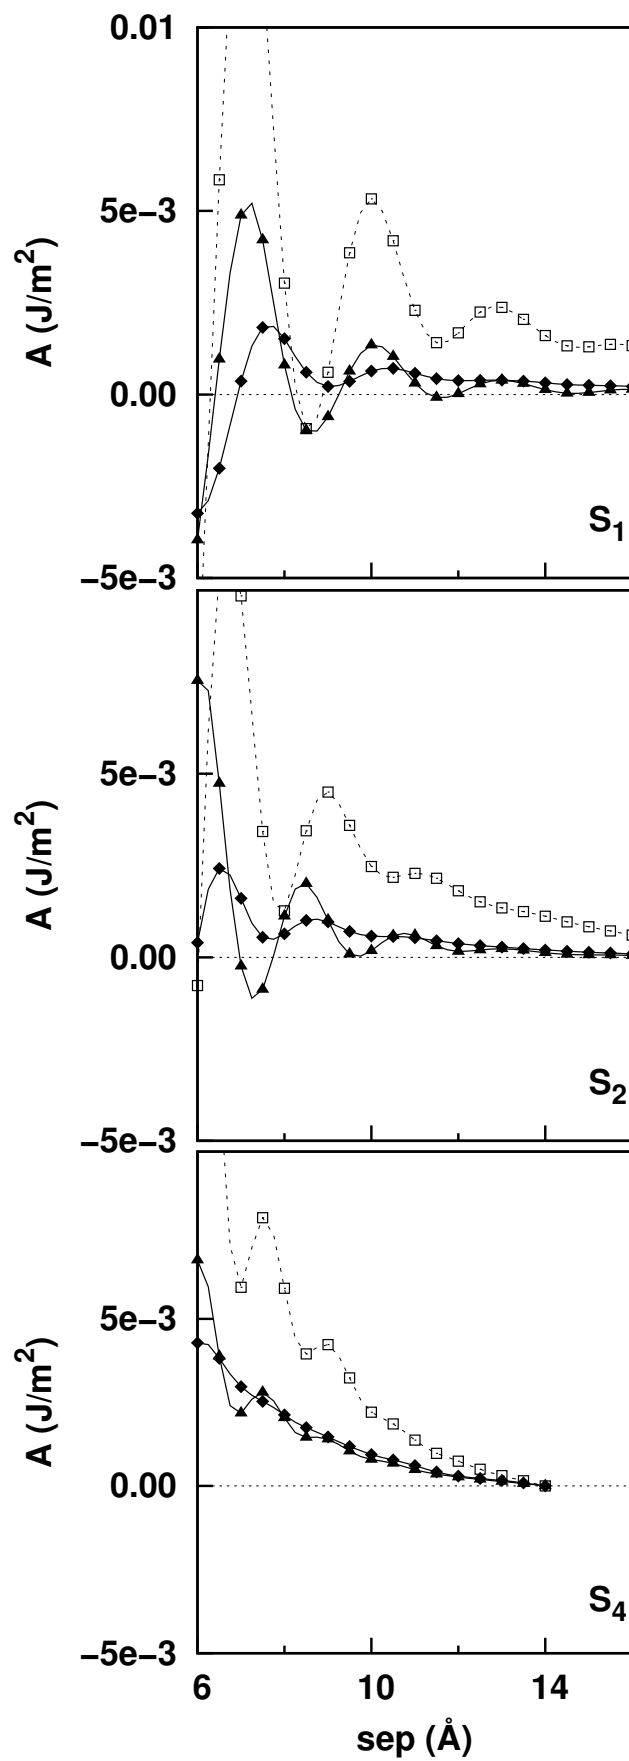

Figure S4 As in the insets of Figure 8, but for the S<sub>1</sub>, S<sub>2</sub>, and S<sub>4</sub> systems.
